# Supplementary material
Source: Elsevier journal article supplement (https://www.sciencedirect.com/science/article/pii/S0300893220305467)
Supplement: mmc1 [file mmc1.pdf]

## Epidemiología y tratamiento de la insuficiencia cardiaca en España: estudio PATHWAYS-HF

### MATERIAL ADICIONAL

**Figura 1 del material adicional.** Representatividad demográfica entre BIG-PAC y la población española. A: índices demográficos. B: pirámide etaria. Fuente: Instituto Nacional de Estadística (2018).

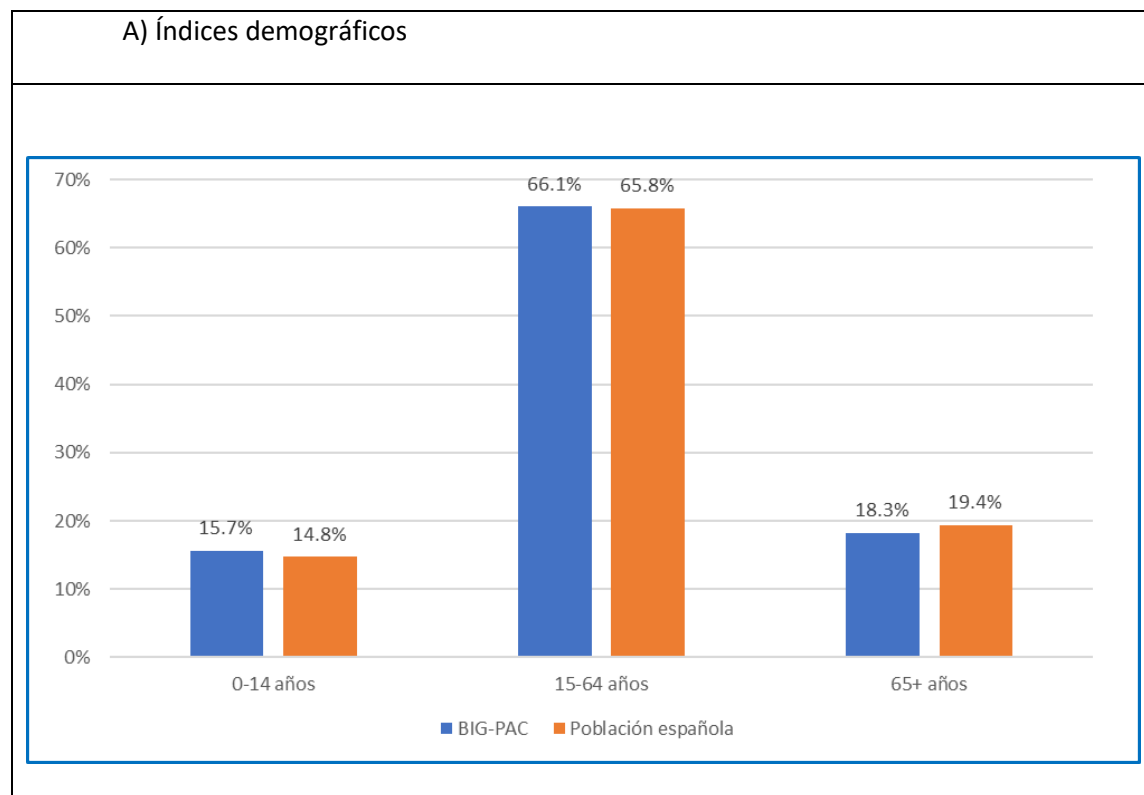

B) Pirámide etaria

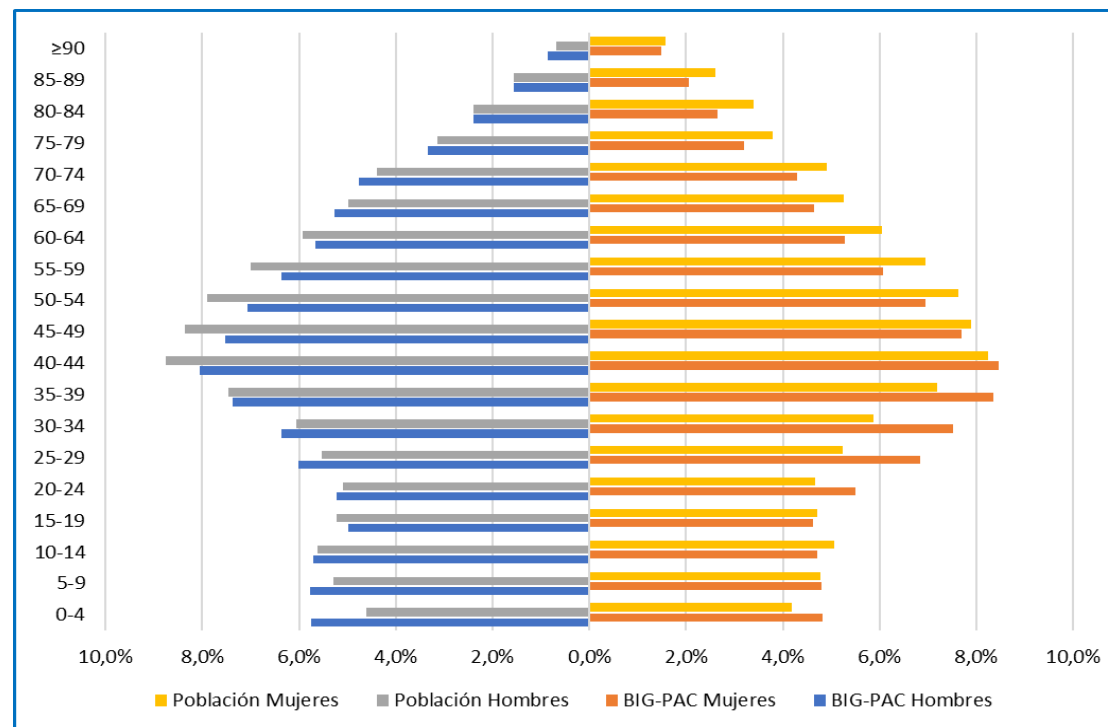

Fuente\*: Instituto Nacional de Estadística, año 2018
